# Supplementary material for: Exercise Training Induces Depot-Specific Adaptations to White and Brown Adipose Tissue
Source: PubMed Central journal article supplement — iScience. 2019 Jan 3;11:425–39. doi: 10.1016/j.isci.2018.12.033 (PMC6348298; doi:10.1016/j.isci.2018.12.033), 2019-01-03
Supplement: mmc1.pdf [file mmc1.pdf]

**ISCI, Volume 11**

## **Supplemental Information**

### **Exercise Training Induces Depot-Specific**

### **Adaptations to White and Brown**

### **Adipose Tissue**

**Adam C. Lehnig, Revati S. Dewal, Lisa A. Baer, Kathryn M. Kitching, Vitor Rosetto Munoz, Peter J. Arts, Devin A. Sindeldecker, Francis J. May, Hans P.M.M. Lauritzen, Laurie J. Goodyear, and Kristin I. Stanford**

**Figure S1. Effects of exercise on gene expression in isWAT, Related to Figure 2,3.** Expression of genes involved in (A) mitochondrial activity and beiging, (B) glucose metabolism, and (C) fatty acid oxidation in isWAT. Data are presented as means  $\pm$  S.E.M. (n=8/group; \* $P$ <0.05).

**Figure S2. Effects of exercise on gene expression in cWAT and rpWAT, Related to Figure 4-6.** Expression of genes involved in mitochondrial activity and beiging, glucose metabolism, and fatty acid oxidation in cWAT (A-C) and rpWAT (D-F). Data are presented as means  $\pm$  S.E.M. (n=8/group; \* $P$ <0.05; \*\* $P$ <0.01).

**Figure S3. Effects of exercise on triWAT, Related to Figure 4-6.** (A) Expression of genes involved in mitochondrial activity and beiging, (B) glucose metabolism, and (C) fatty acid oxidation in triWAT. Protein expression of (D) CS, (E) HK2, (F) GLUT1, (G) GLUT4, (H) CD36, (I) FATP1, and (J) pHSL/HSL in triWAT. Data are presented as means  $\pm$  S.E.M. (n=8/group).

**Figure S4. Effects of exercise on gene expression in mBAT, prBAT, aBAT, and cBAT, Relate to Figure 7.** Expression of genes involved in mitochondrial activity and beiging, glucose metabolism, and fatty acid oxidation in mBAT (A-C), prBAT (D-F), aBAT (G-I), and cBAT (J-L). Data are presented as means  $\pm$  S.E.M. (n=8/group; \* $P$ <0.05, \*\* $P$ <0.01).

**Figure S1****A**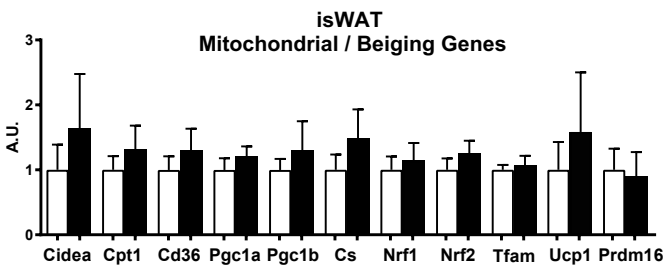**B**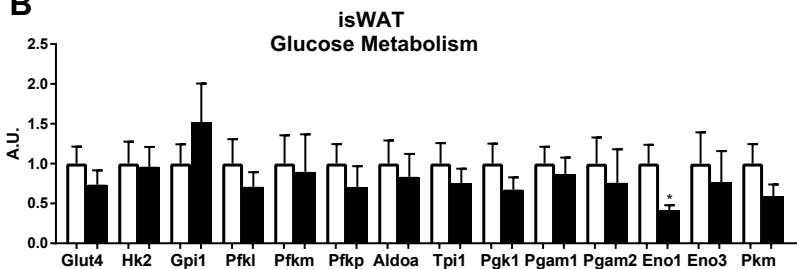**C**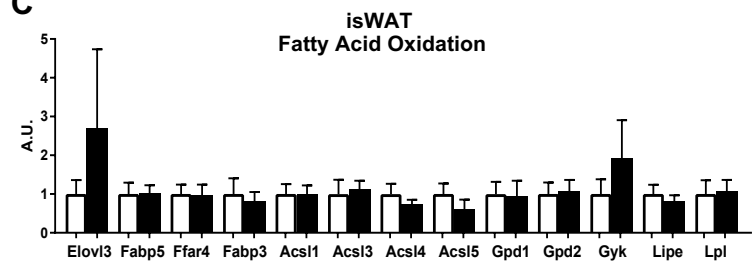

**Figure S2**

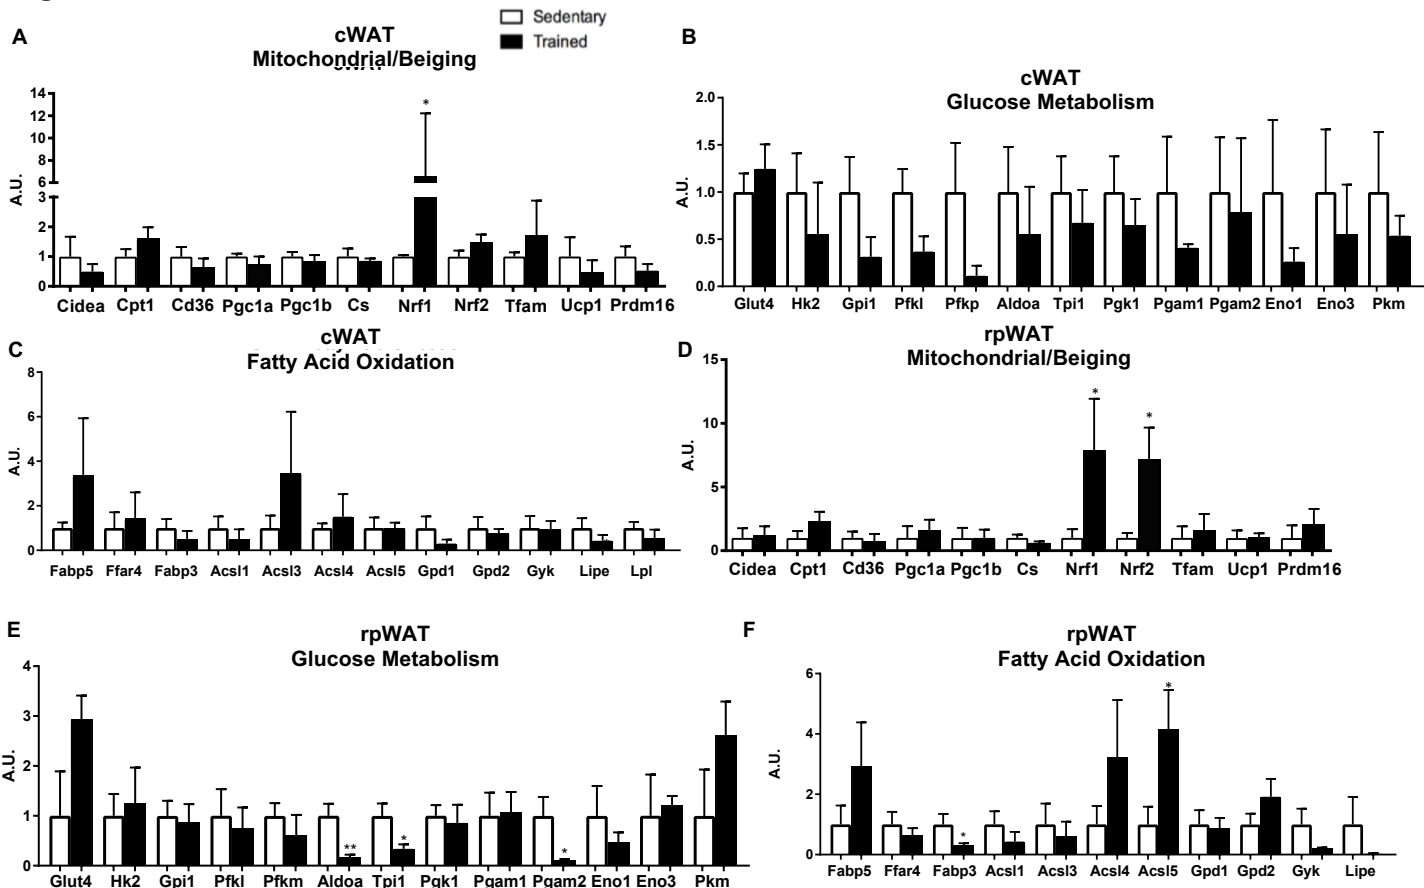

**Figure S3**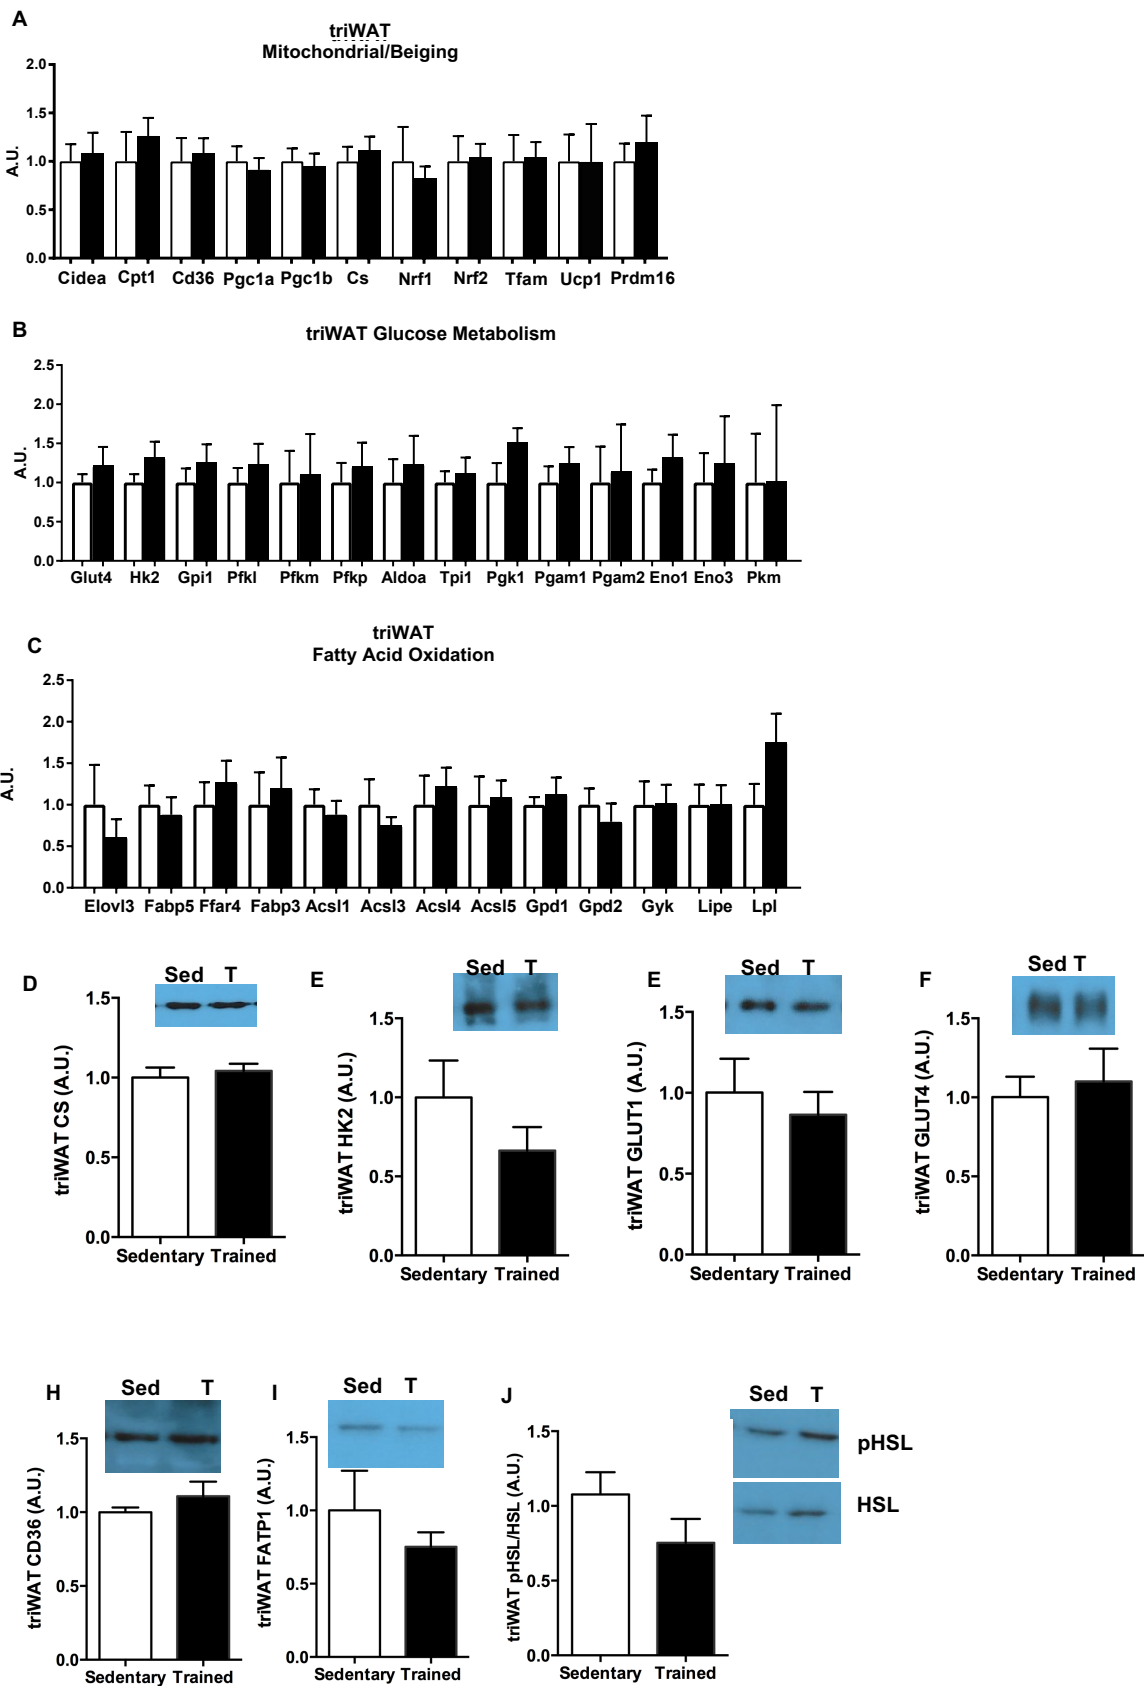

**Figure S4**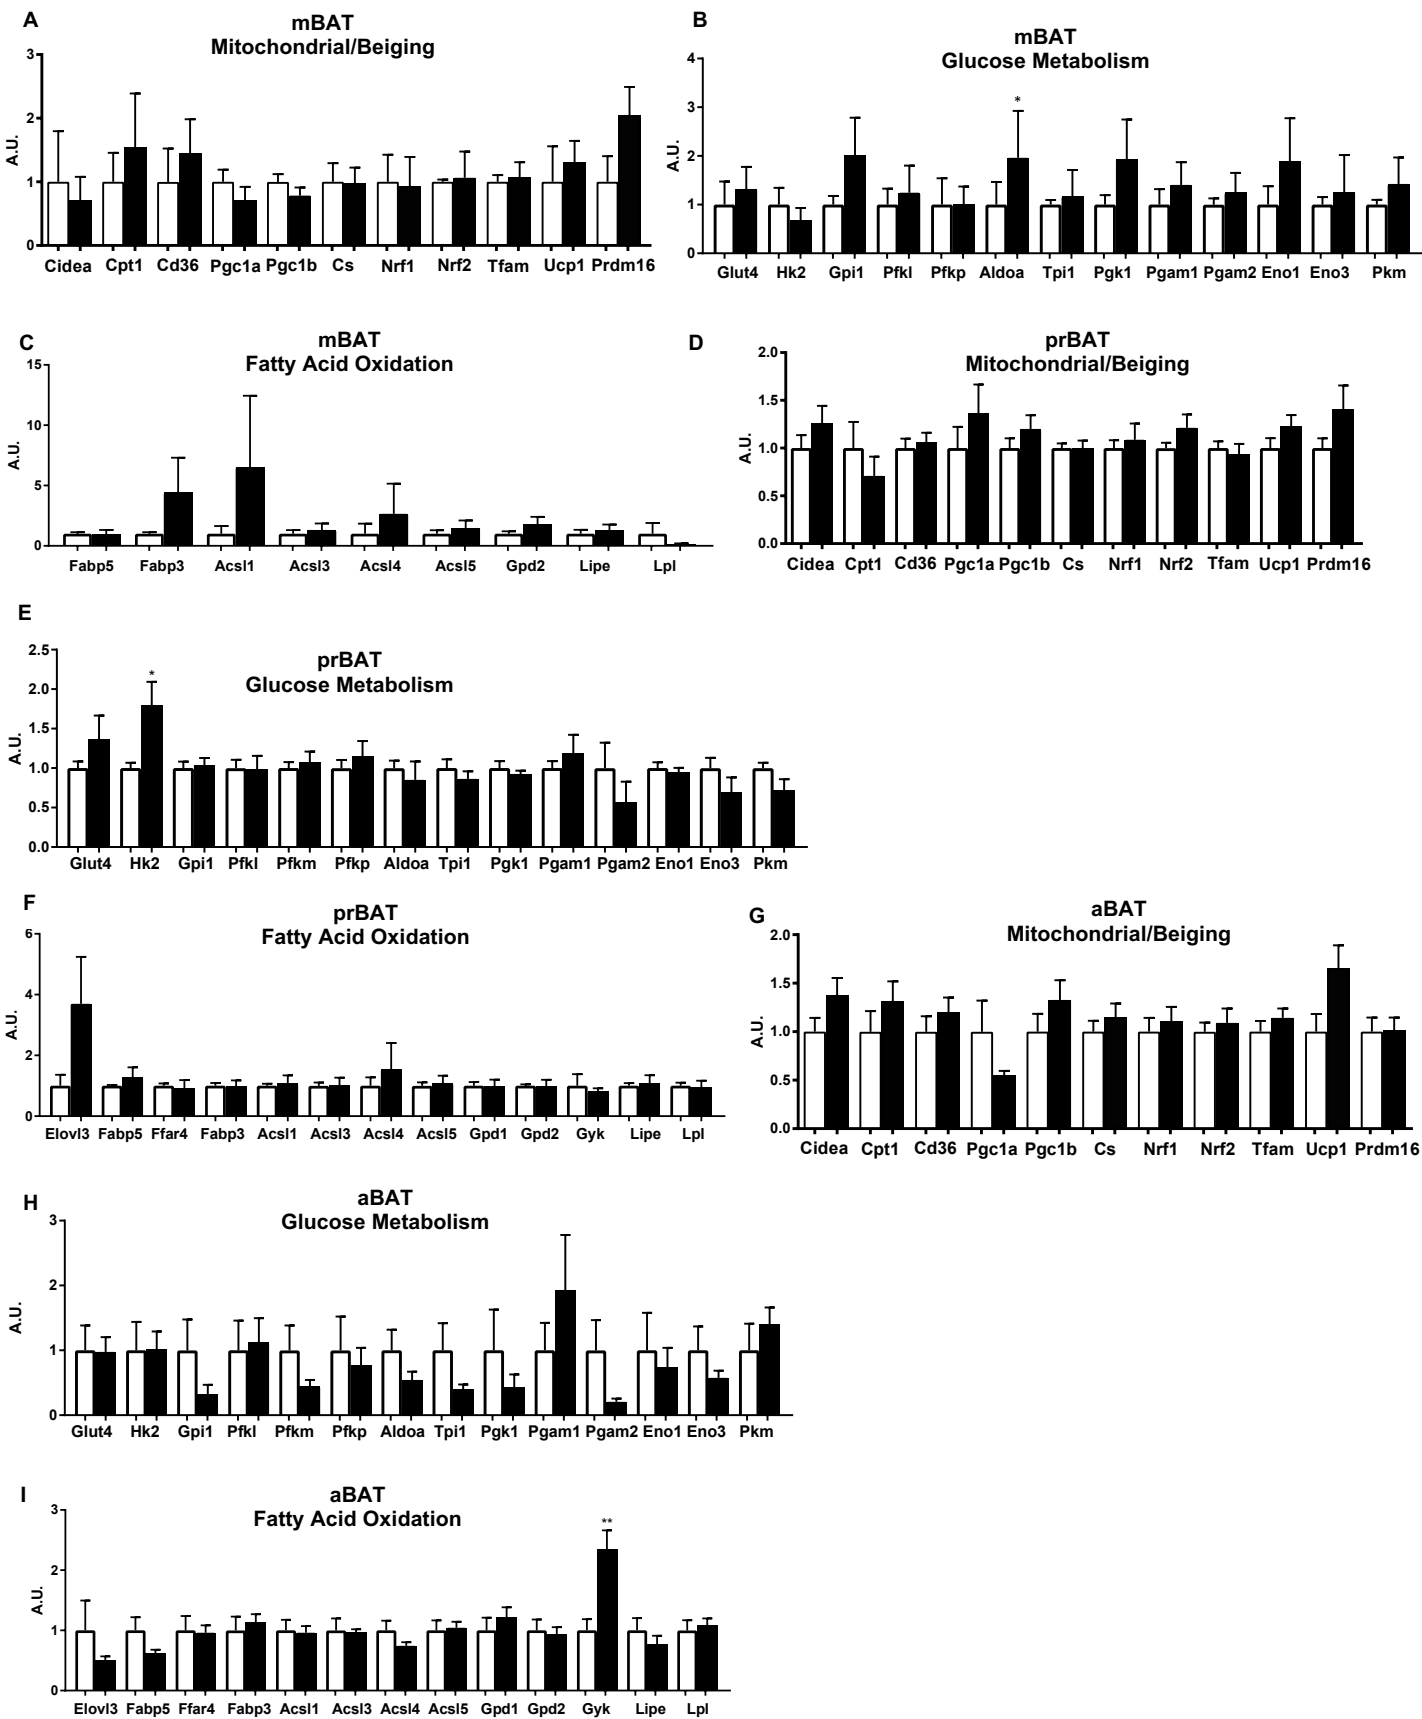

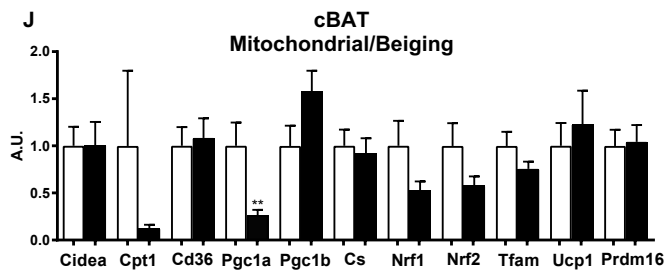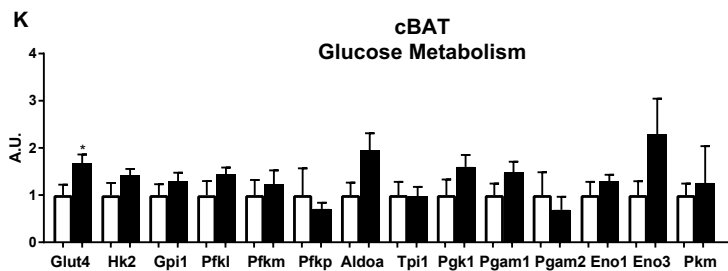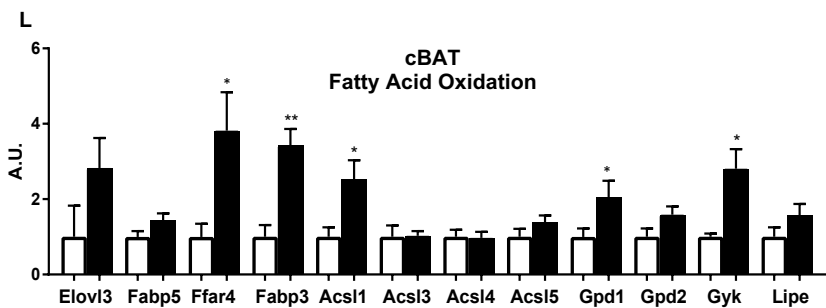

**Supplementary Table 1: qPCR forward and reverse primer sequences for the genes measured, Related to Figure 2-7.**

| <b>Gene</b> | <b>Forward Primer Sequence</b> | <b>Reverse Primer Sequence</b> |
|-------------|--------------------------------|--------------------------------|
| Cidea       | GGTGGACACAGAGGAGTTCTTTC        | CGAAGGTGACTCTGGCTATTCC         |
| Cpt1        | AAAGATCAATCGGACCCTAGACA        | CAG CGA GTA GCG CAT AGT CA     |
| Cd36        | TGG AGC TGT TAT TGG TGC AG     | TGG GTT TTG CAC ATC AAA GA     |
| Pgc1a       | GAATCAAGCCACTACAGACCCG         | CATCCCTCTTGAGCCTTTCGTG         |
| Pgc1b       | TCCTGTAAAAGCCCGGAGTAT          | GCTCTGGTAGGGGCAGTGA            |
| Cs          | GACTACATCTGGAACACACTCAATTCA    | CGAGGGTCAGTCTTCTCAGTAC         |
| Nrf1        | CAACAGGGAAGAAACGGAAA           | GCACCACATTCTCCAAAGGT           |
| Nrf2        | AGGTTGCCACATTCCTCAAACAAG       | TTGCTCCATGTCCTGCTCTATGCT       |
| Tfam        | GTCCATAGGCACCGTATTGC           | CCCATGCTGGAAAAACACTT           |
| Ucp1        | AGGCTTCCAGTACCATTAGGT          | CTGAGTGAGCAAAGCTGATT           |
| Prdm16      | ATCCACAGCACGGGTGAAGCCAT        | ACATCTGCCACAGTCCTTGCA          |
| Glut4       | ATCATCCGGAACCTGGAGG            | CGGTCAGGCGCTTTAGACTC           |
| Hk2         | AGAGAACAAGGGCGAGGAG            | GGAAGCGGACATCACAAATC           |
| Gpi1        | ATGGGCATATTCTGGTGGAC           | CCCATTCTCGGTGTAGTTG            |
| Pfkf1       | CCATCAGCAACAATGTGCCTGG         | TGAGGCTGACTGCTTGATGCGA         |
| Pfkm        | CTGGTGCTGAGGAATGAGAA           | TTCCTGTCAAAGGGAGTTGG           |
| Pfkp        | AAGCTATCGGTGTCCTGACC           | TCCCACCCACTTGACAGAAT           |
| Aldoa       | GCGACCACCATGTCTATCTG           | GAAAGTGACCCCAAGTGACAG          |
| Tpi1        | TATGGAGTTCTGTGACTGGA           | CGGTGGGAGCAGTTACTAAA           |
| Pgk1        | GAGCCTCACTGTCCAAACTA           | CTTTAGCGCCTCCCAAGATA           |
| Pgam1       | GACGATCTTATGATGTCCCACC         | GTACCTGCGATCCTTGCTGA           |
| Pgam2       | CTGCCTACCTGTGAAAGTCTC          | GACATCCCTCCAGATGTTT            |
| Eno1        | CTTGCTTTGCAGCGATCCTA           | GAAGAGACCTTTTGCGGTGT           |
| Eno3        | CTGTGCCTGCCTTTAATGTG           | CTTCCCATACTTGGCCTTGA           |
| Pkm         | CTGTGGAGATGCTGAAGGAG           | CAACAGGACGGTAGAGAATGG          |
| Elov13      | GTGCTTTGCCATCTACACGGATG        | ATGAGTGGACGCTTACGCAGGA         |
| Fabp5       | GACGACTGTGTCTCTTGTAAACC        | TGTTATCGTGCTCTCCTTCCCG         |
| Ffar4       | GTGACTTTGAACTTCTGGTGCC         | CAGAGTATGCCAAGCTCAGCGT         |
| Fabp3       | AGAGTTCGACGAGGTGACAGCA         | TTGTCTCCTGCCCGTTCCACTT         |
| Acs11       | ACACTTCTTGAAGCGATGG            | GGCTCGACTGTATCTTGTGG           |
| Acs13       | GGCCAACGTGAAAAAGAAAG           | GTCTTGGAATCCTTCTCGCC           |
| Acs14       | GCACCTTCGACTCAGATCAC           | CCAGGTTTGTCTGAAGTGGG           |
| Acs15       | CGCCCCATCTCCACTCCAG            | GCTTCAAACACCCAACATCCCATTGC     |
| Gpd1        | CTCATCACGACCTGCTATGG           | CTGCTCAATGGACTTCCAG            |
| Gpd2        | GCGGACTCATACAATAGCA            | TGAAGGAACAGCCCAACAG            |
| Gyk         | CAAATGCAAGCAGGACGATG           | GGCCCCAGCTTTCATTAGG            |



Lipe  
Lpl

TGGCACACCATTTGACCTG  
GATGCCCTACAAAGTGTCCA

TTGCGGTTAGAAGCCACATAG  
AAATCTCGAAGGCCTGGTTG

## Transparent Methods

### *Animals*

Male 10-week-old C57BL/6 mice from Charles River Laboratory were fed a chow diet (21% kcal from fat; PharmaServ9f5020) and housed at room temperature (22°C) on a 12-hour light/dark cycle. All procedures were approved by the IACUC at The Ohio State University and the Joslin Diabetes Center.

### *Mouse Training Protocol*

Mice were divided into two groups: sedentary and exercise-trained. The exercise-trained group was individually housed in wheel cages (24.5 cm in diameter and 8 cm in width; Nalgene), allowing for voluntary access to physical activity *ad lib*. The total number of wheel cage revolutions was monitored daily and the accumulated running distance was calculated. Mice were investigated after either 5 or 11 days of exercise training for NADH autofluorescence experiments or after 3 weeks of exercise training for all other experiments. Mice ran an average of  $7\pm 0.6$  km/day or a total of a  $35\pm 1.1$  km over 5 days,  $77\pm 2.7$  km over 11 days, and or a total of  $152\pm 7$  km over a 3 wk period. Any mouse that ran 10% less than the average of the trained group was excluded from analyses. The sedentary control mice were age-matched and maintained in individual static cages without running wheels and treated identically to the wheel cage-housed mice. After 3 weeks, mice were fasted overnight, removed from the cages, anesthetized 4 hours following removal from static or wheel cage, sacrificed, and all 14 adipose depots (ingWAT, pgWAT, iBAT, mWAT, rpWAT, triWAT, asWAT, prWAT, prBAT, mBAT, cBAT, cWAT, isWAT, and aBAT) were immediately removed, flash frozen in LN<sub>2</sub>, and then stored at -80°C.

### *qPCR*

Tissue processing and qPCR were performed as previously described (Lessard et al., 2013). Sigma-Aldrich custom primers were used for genes of interest with the sequences shown in Supplementary Table 1. All qPCR gene expression was normalized to the housekeeping gene GAPDH.

### *Glucose Uptake in Isolated SVF Differentiated into Adipocytes.*

The stromal vascular fraction (SVF) was isolated from ingWAT and iBAT from sedentary and trained mice and was plated at equal cell number. The cells underwent adipogenic differentiation (Stanford et al., 2015; Tseng et al., 2004), and 8 days post-differentiation cells were serum starved for 3 hours in low glucose DMEM. Glucose uptake was determined by the addition of [<sup>3</sup>H]-2-deoxyglucose for 10 minutes on ice. Cells were washed with ice-cold saline solution and harvested in 0.05 N NaOH to determine net accumulation of [<sup>3</sup>H]-2-deoxyglucose.

### *Oxygen Consumption Rates*

Isolated SVF from ingWAT, pgWAT, and iBAT were seeded onto gelatin coated 24 well plates and differentiated according to standard protocols. The cell plates and assay cartridges have four ports allowing for drug delivery to individual wells during measurement of oxygen consumption. Cells were serum starved for 1 hour, and oxygen consumption rates (OCR) were measured in media containing 200 $\mu$ M palmitate plus 100 $\mu$ M albumin in a Seahorse XF24 instrument using the standard protocol of 3 minute mix, 2 minute wait, and 3 minute measure. For the bioenergetic profile, cells were first given oligomycin to block ATP synthase, FCCP as an uncoupler, and Rotenone to block Complex 1 of the ETC (all from Sigma).

### *NADH Autofluorescence and Image Analysis*

After 5 and 11 days of exercise training, mice were anesthetized with Phenobarbital sodium (90 mg/Kg, i.p.) and the skin covering the ingWAT or iBAT was opened to expose the AT. The mice were mounted on their side or dorsally in dental cement, as previously described (Lauritzen et al., 2008; Lauritzen et al., 2006). This was followed by 40 minutes of temperature and movement stabilization period with mice placed on a heating pad to maintain core body temperature. After 40 minutes, basal pairs of images were obtained. The Zeiss Chameleon Multiphoton laser was used at 710 nm for excitation of NADH. NADH fluorescence was collected and descanned between 410-650 nm as previously described (Huang et al., 2002). Adipose tissue sections were obtained as TIF images with the Zeiss confocal software and were imported into Metamorph Software (V. 6.1, Universal Imaging Corp). Image stacks were created. The average area and intensity of NADH positive structures were quantified .

### *Western Blotting*

Tissue processing and immunoblotting were performed as previously described (Stanford et al., 2015). The GLUT1, GLUT4, and CD36 (ThermoScientific), FATP1 (Santa Cruz), hexokinase 2 (HK2), citrate synthase (CS) and UCP1 (AbCam), HSL and pHSL(Ser565) (Cell Signaling), and GAPDH (Pierce) antibodies were obtained from a commercial source. All data was normalized to GAPDH antibody.

### *Statistics*

The data are presented as the mean  $\pm$  SEM. Statistical significance was defined as  $p < 0.05$  and determined by two-way Student t-tests. For Seahorse data, all plots represent 8–10

wells per time point per treatment group, and error bars are standard error of the mean (SEM). Quantifications in bar plots are averages of four timepoints with 8–10 wells per time point, and error bars are SEM. Statistical comparisons were done by Student's *t*-test. The number of samples used to determine statistical significance is indicated in the figure legends.

## References

- Huang, S., Heikal, A.A., and Webb, W.W. (2002). Two-photon fluorescence spectroscopy and microscopy of NAD(P)H and flavoprotein. *Biophysical journal* *82*, 2811-2825.
- Lauritzen, H.P., Galbo, H., Brandauer, J., Goodyear, L.J., and Ploug, T. (2008). Large GLUT4 vesicles are stationary while locally and reversibly depleted during transient insulin stimulation of skeletal muscle of living mice: imaging analysis of GLUT4-enhanced green fluorescent protein vesicle dynamics. *Diabetes* *57*, 315-324.
- Lauritzen, H.P., Ploug, T., Prats, C., Tavaré, J.M., and Galbo, H. (2006). Imaging of insulin signaling in skeletal muscle of living mice shows major role of T-tubules. *Diabetes* *55*, 1300-1306.
- Lessard, S.J., Rivas, D.A., Alves-Wagner, A.B., Hirshman, M.F., Gallagher, I.J., Constantin-Teodosiu, D., Atkins, R., Greenhaff, P.L., Qi, N.R., Gustafsson, T., et al. (2013). Resistance to aerobic exercise training causes metabolic dysfunction and reveals novel exercise-regulated signaling networks. *Diabetes* *62*, 2717-2727.
- Stanford, K.I., Middelbeek, R.J., Townsend, K.L., Lee, M.Y., Takahashi, H., So, K., Hitchcox, K.M., Markan, K.R., Hellbach, K., Hirshman, M.F., et al. (2015). A novel role for subcutaneous adipose tissue in exercise-induced improvements in glucose homeostasis. *Diabetes* *64*, 2002-2014.
- Tseng, Y.H., Kriauciunas, K.M., Kokkotou, E., and Kahn, C.R. (2004). Differential roles of insulin receptor substrates in brown adipocyte differentiation. *Molecular and cellular biology* *24*, 1918-1929.
